# Supplementary material for: Fast detection of organic amine vapors based on fluorescent nanofibrils fabricated from triphenylamine functionalized β-diketone-boron difluoride
Source: Royal Society of Chemistry journal article supplement (doi:10.1039/c1jm14187b), 2011-11-17
Supplement: c1jm14187b.pdf [file c1jm14187b.pdf]

## **Supplementary Information for:**

### **Fast detection for organic amine vapors based on fluorescent nanofibrils fabricated from triphenylamine functionalized $\beta$ -diketone-boron difluoride**

Xiaofei Zhang, Xingliang Liu, Ran Lu<sup>\*</sup>, Haojun Zhang and Peng Gong

*State Key Laboratory of Supramolecular Structure and Materials, College of Chemistry, Jilin*

*University, Changchun 130012, P. R. China*

Fax: + 86-431-88499179, E-mail: [luran@mail.jlu.edu.cn](mailto:luran@mail.jlu.edu.cn)

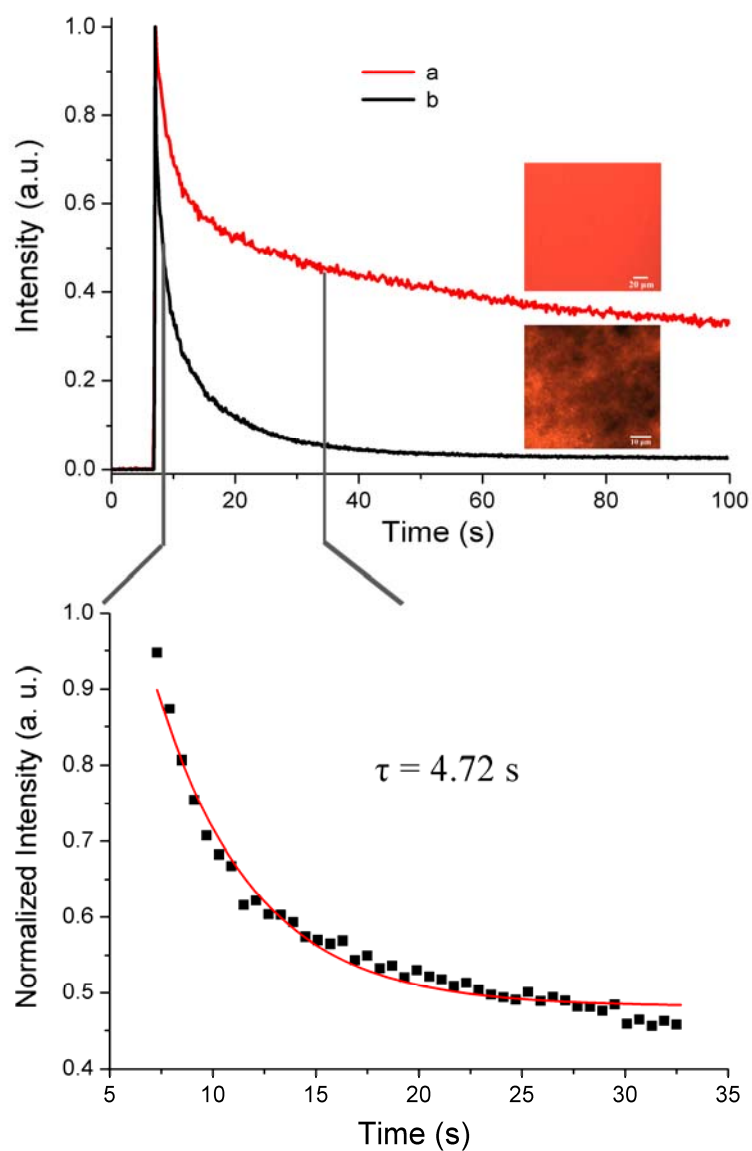

**Fig. S1** Time-courses of the fluorescence quenching of the amorphous (a) and nanofibrils-based (b) films upon exposed to the saturated vapor of aniline, the intensity was monitored at 640 nm.

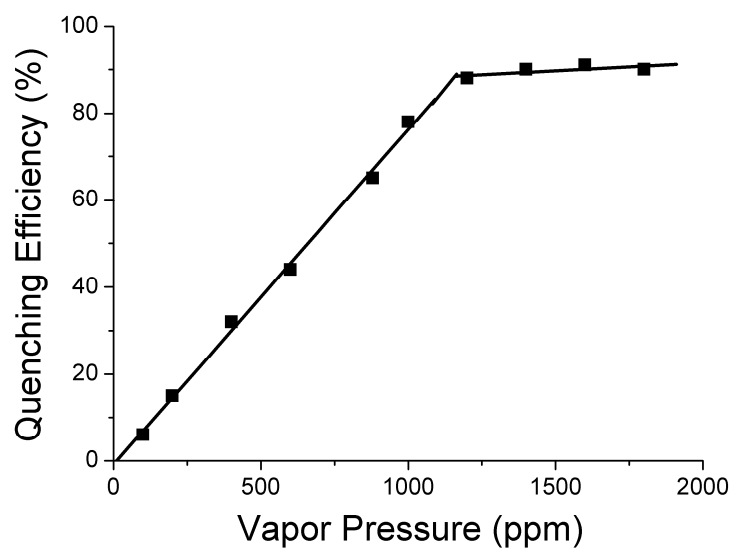

**Fig. S2** The concentration-dependent fluorescence quenching efficiency of the nanofibrils **1**

deposited on glass slide exposed to pyridine vapor for 10 s.

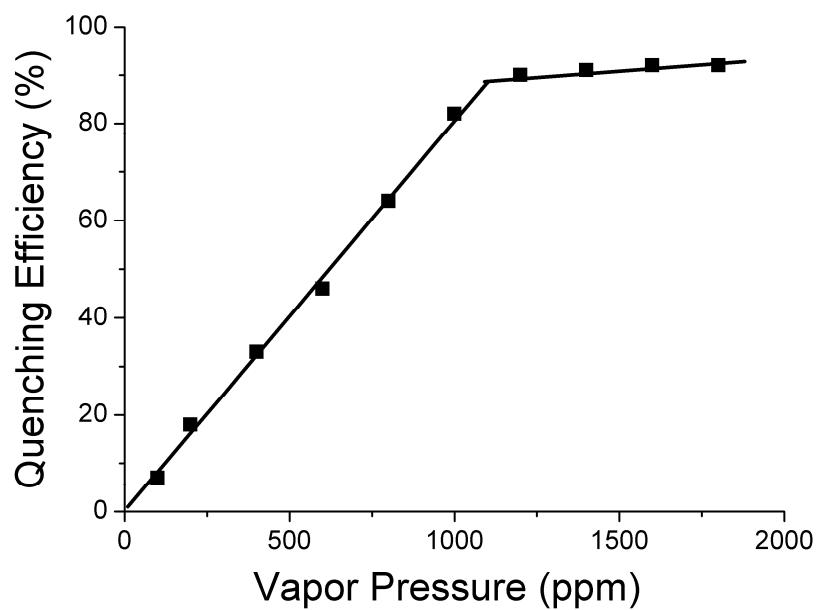

**Fig. S3** The concentration-dependent fluorescence quenching efficiency of the nanofibrils **1**

deposited on glass slide exposed to triethylamine vapor for 10 s.

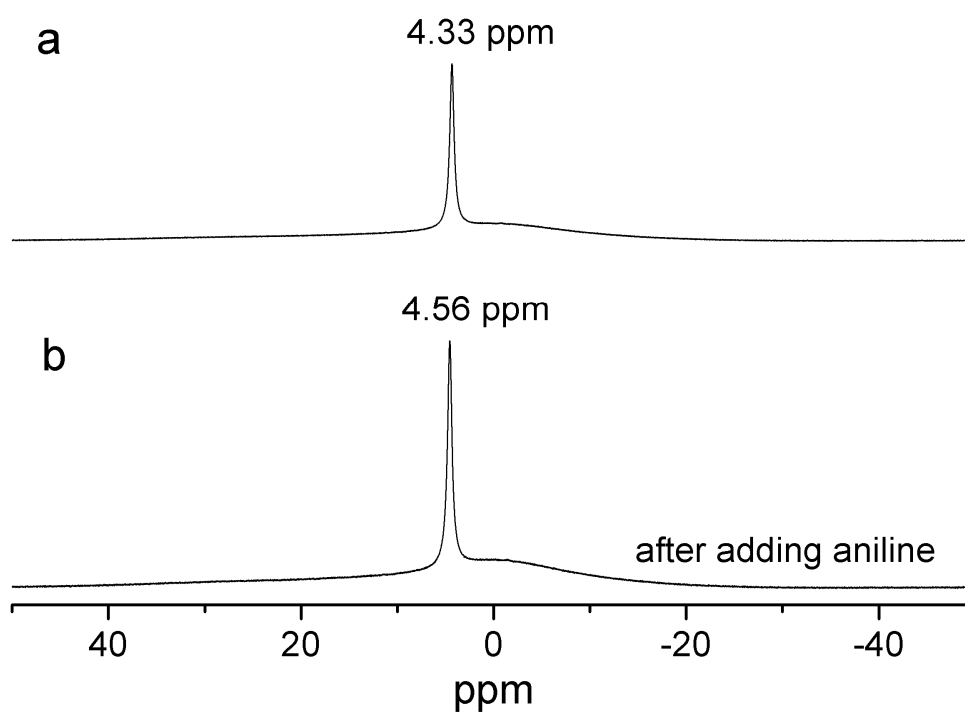

**Fig. S4**  $^{11}\text{B}$  NMR (160.4 MHz) spectra of compound **1** (a) and after adding aniline (b).

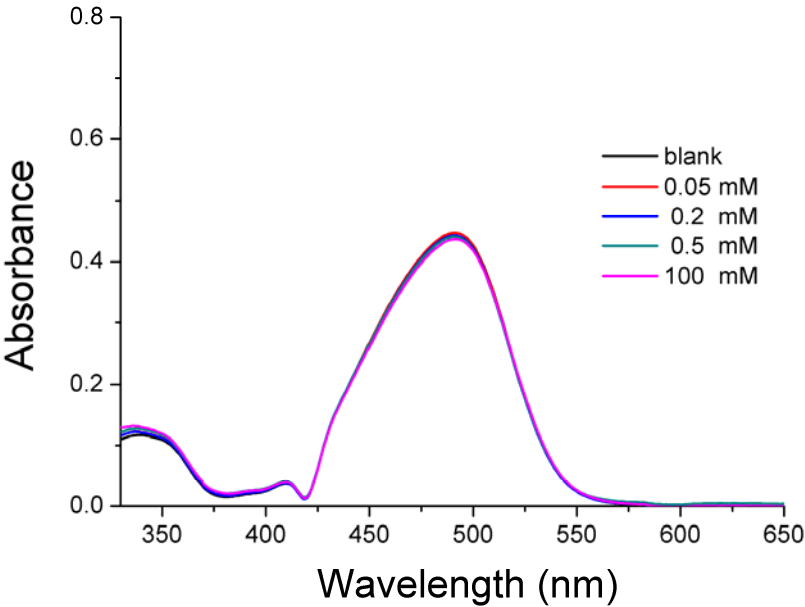

**Fig. S5** UV-vis absorption spectra of **1** upon adding different amount of aniline in toluene (5  $\mu$ M).

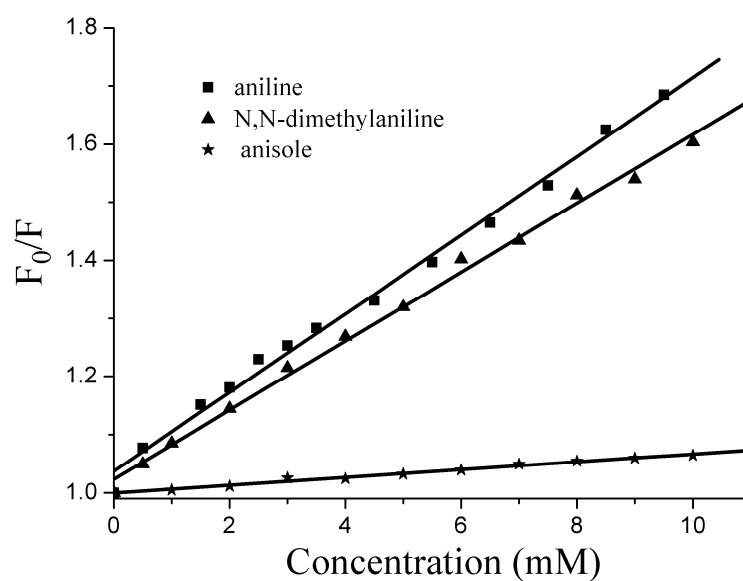

**Fig. S6.** Stern-Volmer plots for **1** in toluene ( $5 \times 10^{-6}$  M) in response to aniline, N,N-dimethylaniline, anisole. The fluorescence intensity was monitored at 590 nm ( $\lambda_{\text{ex}} = 490$  nm).

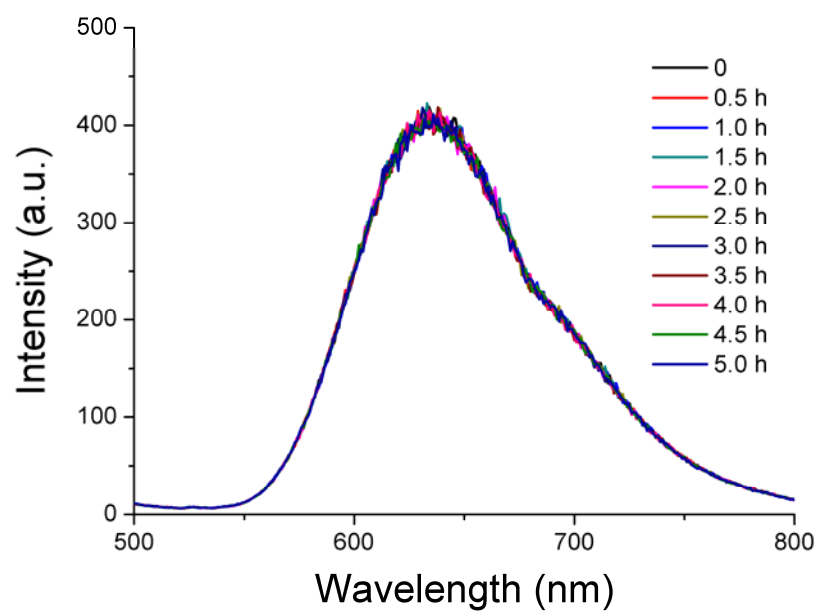

**Fig. S7** The time-dependent of the fluorescence spectra of the nanofibrils **1** deposited on glass slide exposed to natural light at room temperature.
